# Supplementary material
Source: publisher figshare collection journal article supplement (https://diabetesjournals.figshare.com/ndownloader/files/38970029)
Supplement: Supplementary file 1 [file 38970029]

## **Supplementary**

Combination of Multiple Low-Risk Lifestyle Behaviors and Incident Type 2 Diabetes: A

Systematic Review and Dose-Response Meta-Analysis of Prospective Cohort Studies

**Supplementary table 1. Search Strategy**

| Database and Search Terms                                                                                                                                                                                                                                                                                                                                                                                                                                                                                                                                                                                                                                                                                                                                                                                                                                                                                                                                                                                                                                                                                                    |                                                                                                                                                                                                                                                                                                                                                                                                                                                                                                                                                                                                                                                                                                                                                                                                                                                                                                                                                                                                                                                                                                    |                                                                                                                                                                                                                                                                                                                                                                                                                                                                                                                                                                                                                                                                                                                                                                                                                                                                                                                                                                                                                                                                                                                                                                                                                                                     |
|------------------------------------------------------------------------------------------------------------------------------------------------------------------------------------------------------------------------------------------------------------------------------------------------------------------------------------------------------------------------------------------------------------------------------------------------------------------------------------------------------------------------------------------------------------------------------------------------------------------------------------------------------------------------------------------------------------------------------------------------------------------------------------------------------------------------------------------------------------------------------------------------------------------------------------------------------------------------------------------------------------------------------------------------------------------------------------------------------------------------------|----------------------------------------------------------------------------------------------------------------------------------------------------------------------------------------------------------------------------------------------------------------------------------------------------------------------------------------------------------------------------------------------------------------------------------------------------------------------------------------------------------------------------------------------------------------------------------------------------------------------------------------------------------------------------------------------------------------------------------------------------------------------------------------------------------------------------------------------------------------------------------------------------------------------------------------------------------------------------------------------------------------------------------------------------------------------------------------------------|-----------------------------------------------------------------------------------------------------------------------------------------------------------------------------------------------------------------------------------------------------------------------------------------------------------------------------------------------------------------------------------------------------------------------------------------------------------------------------------------------------------------------------------------------------------------------------------------------------------------------------------------------------------------------------------------------------------------------------------------------------------------------------------------------------------------------------------------------------------------------------------------------------------------------------------------------------------------------------------------------------------------------------------------------------------------------------------------------------------------------------------------------------------------------------------------------------------------------------------------------------|
| MEDLINE                                                                                                                                                                                                                                                                                                                                                                                                                                                                                                                                                                                                                                                                                                                                                                                                                                                                                                                                                                                                                                                                                                                      | EMBASE                                                                                                                                                                                                                                                                                                                                                                                                                                                                                                                                                                                                                                                                                                                                                                                                                                                                                                                                                                                                                                                                                             | COCHRANE                                                                                                                                                                                                                                                                                                                                                                                                                                                                                                                                                                                                                                                                                                                                                                                                                                                                                                                                                                                                                                                                                                                                                                                                                                            |
| <ol style="list-style-type: none"> <li>1. Health Behavior/</li> <li>2. life style/</li> <li>3. life change events/</li> <li>4. risk reduction behavior/</li> <li>5. Lifestyle*.tw</li> <li>6. Life Style*.tw</li> <li>7. Low Risk adj2<br/>Behavio?r*.tw</li> <li>8. Health* adj2<br/>Behavio?r*.tw</li> <li>9. Habit*.tw</li> <li>10. Diabetes Mellitus, Type 2/</li> <li>11. Type 2 adj7 diabet*.tw</li> <li>12. Type ii adj7 diabet*.tw</li> <li>13. Type 2 adj1 dm.tw</li> <li>14. Type ii adj1 dm.tw</li> <li>15. Non-insulin dependent diabetes.tw</li> <li>16. Adult-onset diabetes.tw</li> <li>17. Maturity-onset diabetes.tw</li> <li>18. T2D*.tw</li> <li>19. DM2.tw</li> <li>20. MODY.tw</li> <li>21. NIDDM.tw</li> <li>22. risk factors/</li> <li>23. Prevent*.tw</li> <li>24. Risk*.tw</li> <li>25. exp cohort studies/</li> <li>26. cohort\$.tw.</li> <li>27. controlled clinical trial.pt.</li> <li>28. epidemiologic methods/</li> <li>29. limit 28 to yr=1971-1988</li> <li>30. or/1-9</li> <li>31. or/10-21</li> <li>32. or/22-24</li> <li>33. or/25-27,29</li> <li>34. 30 and 31 and 32 and 33</li> </ol> | <ol style="list-style-type: none"> <li>1. Health Behavior/</li> <li>2. lifestyle/</li> <li>3. lifestyle modification/</li> <li>4. risk reduction/</li> <li>5. Lifestyle*.tw</li> <li>6. Life Style*.tw</li> <li>7. Low Risk adj2<br/>Behavio?r*.tw</li> <li>8. Health* adj2<br/>Behavio?r*.tw</li> <li>9. Habit*.tw</li> <li>10. Type 2 adj7 diabet*.tw</li> <li>11. Type ii adj7 diabet*.tw</li> <li>12. Type 2 adj1 dm.tw</li> <li>13. Type ii adj1 dm.tw</li> <li>14. Non-insulin dependent diabetes mellitus/</li> <li>15. Adult-onset diabetes.tw</li> <li>16. Maturity-onset diabetes.tw</li> <li>17. T2D*.tw</li> <li>18. DM2.tw</li> <li>19. MODY.tw</li> <li>20. NIDDM.tw</li> <li>21. risk factor/</li> <li>22. Prevent*.tw</li> <li>23. Risk*.tw</li> <li>24. exp cohort analysis/</li> <li>25. exp longitudinal study/</li> <li>26. exp prospective study/</li> <li>27. exp follow up/</li> <li>28. cohort\$.tw.</li> <li>29. or/1-9</li> <li>30. or/10-20</li> <li>31. or/21-23</li> <li>32. or/24-28</li> <li>33. 29 and 30 and 31 and 32</li> <li>34. limit 33 to embase</li> </ol> | <ol style="list-style-type: none"> <li>1. Health Behavior/</li> <li>2. life style/</li> <li>3. life change events/</li> <li>4. risk reduction behavior/</li> <li>5. Lifestyle*.ti,ab,hw</li> <li>6. Life Style*.ti,ab,hw</li> <li>7. Low Risk adj2<br/>Behavio?r*.ti,ab,hw</li> <li>8. Health* adj2<br/>Behavio?r*.ti,ab,hw</li> <li>9. Habit*.ti,ab,hw</li> <li>10. Diabetes Mellitus, Type 2/</li> <li>11. (Type 2 adj7 diabet*).ti,ab,hw</li> <li>12. (Type ii adj7 diabet*).ti,ab,hw</li> <li>13. (Type 2 adj1 dm).ti,ab,hw</li> <li>14. (Type ii adj1 dm).ti,ab,hw</li> <li>15. Non-insulindependentdiabetes.ti,ab,hw</li> <li>16. Adult-onset diabetes.ti,ab,hw</li> <li>17. Maturity-onset diabetes.ti,ab,hw</li> <li>18. T2D*.ti,ab,hw</li> <li>19. DM2.ti,ab,hw</li> <li>20. MODY.ti,ab,hw</li> <li>21. NIDDM.ti,ab,hw</li> <li>22. risk factors/</li> <li>23. Prevent*.ti,ab,hw</li> <li>24. Risk*.ti,ab,hw</li> <li>25. exp cohort studies/</li> <li>26. cohort\$.ti,ab,hw</li> <li>27. controlled clinical trial.pt.</li> <li>28. epidemiologic methods/</li> <li>29. limit 28 to yr=1971-1988</li> <li>30. or/1-9</li> <li>31. or/10-21</li> <li>32. or/22-24</li> <li>33. or/25-27,29</li> <li>34. 30 and 31 and 32 and 33</li> </ol> |

| Database                | Total |
|-------------------------|-------|
| MEDLINE – Sep 7, 2022   | 2,504 |
| EMBASE – Sep 7, 2022    | 4,136 |
| Cochrane - Jul 16, 2021 | 347   |
| Total                   | 6,987 |

The original search was performed on July 04, 2016; a subsequent updated search was performed on September 7, 2022. Cohort studies were indexed under ‘epidemiological methods’ from 1971 to 1988.

**Supplementary table 2-** Confounding variables included in 17 prospective cohorts examining the relationship between multiple low-risk lifestyle behaviors and type 2 diabetes incidence

| Confounding Variables                             | Aus Diab (1) | CHS (2) | CKB (3)   | DFT J (4) | EPIC -E3N (5) | EPIC -NL (6) | EPIC - Norfolk (7) | EPIC Potsdam (8) | FIN RIS K (9) | FDP S (10) | Hortega (11) | HPF S (12) | MEC (13)  | NIH-AARP (14) | NHS I (12) | NHS II (15) | PHSI (16) | SMHS (17) | SWHS (17) | UK Biobank (18) | VIP (19)  | WH S (16) |
|---------------------------------------------------|--------------|---------|-----------|-----------|---------------|--------------|--------------------|------------------|---------------|------------|--------------|------------|-----------|---------------|------------|-------------|-----------|-----------|-----------|-----------------|-----------|-----------|
| Timing of exposure measurement                    | Base line    | Updated | Base line | Base line | Base line     | Base line    | Base line          | Base line        | Base line     | Updated    | Base line    | Updated    | Base line | Base line     | Updated    | Updated     | Base line | Base line | Base line | Base line       | Base line | Base line |
| Adjusted for primary confounding variable: Age    |              | X       | X         | X         | X             | X            | X                  | X                | NA            | X          | X            | X          | X         | X             | X          | X           | X         | X         | X         | X               | X         | X         |
| Adjusted for 4/6 of important adjustments         | 6/6          | 4/6     | 5/6       | 5/6       | 4/6           | 6/6          | 4/6                | 4/6              | NA            | 3/6        | 4/6          | 5/6        | 4/6       | 4/6           | 5/6        | 5/6         | 4/6       | 4/6       | 4/6       | 5/6             | 4/6       | 4/6       |
| Sex (also stratified)                             | X            | X       | X         | X         | X             | X            | X                  | X                |               | X          | X            | X          | X         | X             | X          | X           | X         | X         | X         | X               | X         | X         |
| Adiposity (included as exposure)                  | X            | X       | X         | X         | X             | X            | X                  | X                |               | X          | X            | X          | X         | X             | X          | X           | X         | X         | X         | X               | X         | X         |
| Smoking (included as exposure)                    | X            | X       | X         | X         | X             | X            |                    | X                |               |            | X            | X          | X         | X             | X          | X           | X         |           |           | X               | X         | X         |
| Family history of diabetes                        | X            |         | X         | X         |               | X            | X                  |                  |               |            |              | X          |           |               | X          | X           |           | X         | X         | X               |           |           |
| Energy intake (included in dietary pattern)       | X            |         |           |           |               | X            |                    |                  |               |            |              |            |           |               |            |             |           |           |           |                 |           |           |
| Physical activity (included as exposure variable) | X            | X       | X         | X         | X             | X            | X                  | X                |               | X          | X            | X          | X         | X             | X          | X           | X         | X         | X         | X               | X         | X         |
| <b>Other variables</b>                            |              |         |           |           |               |              |                    |                  |               |            |              |            |           |               |            |             |           |           |           |                 |           |           |

|                                                   |   |   |   |   |   |   |   |   |   |  |   |   |   |   |   |   |  |  |   |   |   |  |
|---------------------------------------------------|---|---|---|---|---|---|---|---|---|--|---|---|---|---|---|---|--|--|---|---|---|--|
| Employment/<br>Education/<br>Social class         | X | X | X | X | X |   |   | X | X |  | X |   | X | X |   |   |  |  |   | X | X |  |
| Menopause                                         |   |   | X |   |   | X |   |   |   |  |   |   |   | X | X |   |  |  | X |   |   |  |
| Marital Status                                    |   |   | X | X |   |   |   |   |   |  |   |   |   | X |   |   |  |  |   |   |   |  |
| Hypertension                                      | X |   |   | X |   |   |   |   |   |  | X |   | X |   |   |   |  |  |   |   |   |  |
| Ethnicity                                         |   | X |   |   |   |   |   |   |   |  | X | X | X | X | X |   |  |  |   |   |   |  |
| Hyperlipidemia                                    | X |   |   | X |   |   |   |   |   |  | X |   |   |   |   |   |  |  |   |   |   |  |
| Myocardial<br>Infarction                          |   |   |   |   |   |   |   |   |   |  |   | X |   |   | X |   |  |  |   |   |   |  |
| Cancer                                            |   |   |   |   |   |   |   |   |   |  |   | X |   |   | X |   |  |  |   |   |   |  |
| Multivitamin<br>Use                               |   |   |   |   |   |   |   |   |   |  |   | X |   |   | X |   |  |  |   |   |   |  |
| Aspirin Use                                       |   |   |   |   |   |   |   |   |   |  |   | X |   |   | X |   |  |  |   |   |   |  |
| Hormone Use                                       |   |   |   |   |   |   |   |   |   |  |   |   |   |   | X |   |  |  |   |   |   |  |
| Mutual<br>Adjustment<br>for Low risk<br>behaviors |   |   |   |   |   |   |   |   |   |  |   |   | X | X |   | X |  |  |   |   |   |  |
| Time Period                                       |   |   |   |   |   |   |   |   |   |  |   |   |   |   |   | X |  |  |   |   | X |  |
| Medication                                        |   |   |   |   | X |   | X |   |   |  | X |   |   |   |   |   |  |  |   |   |   |  |

Abbreviations: AusDiab=Australian Diabetes, Obesity and Lifestyle Study, CKB=China Kadoorie Biobank study, DFTJ=Dongfeng-Tongji cohort, NHS = Nurses' Health study, EPIC = European Prospective Investigation into Cancer and Nutrition, MEC=Multiethnic Cohort study, NIH-AARP = National Institutes of Health – American Association of Retired Persons, FDPS = Finnish Diabetes Prevention Study, PHS = Physicians Healthy Study, WHS = Women's Health Study, HPFS = Health Professionals Follow-up Study, VIP = Vasterbotten Intervention Program, S=Smoking, A=Alcohol, B=BMI

**Supplementary table 3** – Newcastle Ottawa Scale (NOS) for evaluating the quality of nonrandomized studies

| Cohort                                              | Selection* | Comparability† | Outcome‡ | Total§ |
|-----------------------------------------------------|------------|----------------|----------|--------|
| Australian Diabetes, Obesity and Lifestyle Study(1) | 3          | 1              | 3        | 7      |
| Cardiovascular Health Study(2)                      | 3          | 2              | 3        | 8      |
| China Kadoorie Biobank(3)                           | 3          | 2              | 3        | 8      |
| Dongfeng-Tongji Cohort(4)                           | 2          | 2              | 3        | 7      |
| EPIC-E3N(5)                                         | 3          | 2              | 3        | 8      |
| EPIC-NL(6)                                          | 3          | 2              | 3        | 8      |
| EPIC-Norfolk(7)                                     | 3          | 2              | 3        | 8      |
| EPIC-Postdam(8)                                     | 3          | 2              | 3        | 8      |
| FINRISK Study(9)                                    | NA         | NA             | NA       | NA     |
| Finnish Diabetes Prevention Study(10)               | 4          | 1              | 2        | 7      |
| Health Professionals Follow-up Study(12)            | 2          | 2              | 3        | 7      |
| Hortega Study(11)                                   | 4          | 2              | 3        | 9      |
| Multiethnic Cohort(13)                              | 3          | 1              | 3        | 7      |
| NIH-AARP Diet and Health Study(14)                  | 4          | 2              | 1        | 7      |
| Nurses' Health Study I(12)                          | 2          | 2              | 3        | 7      |
| Nurses' Health Study II(15)                         | 3          | 2              | 3        | 8      |
| Physicians' Health Study I(16)                      | 2          | 2              | 3        | 7      |
| Shanghai Men's Health Study(17)                     | 4          | 2              | 3        | 9      |
| Shanghai Women's Health Study(17)                   | 4          | 2              | 3        | 9      |
| UK Biobank Study(18)                                | 4          | 2              | 3        | 9      |
| Västerbotten Intervention Programme(19)             | 4          | 2              | 3        | 9      |
| Women's Health Study(16)                            | 2          | 2              | 3        | 7      |

\*Maximum of 4 points were given for representativeness of exposed cohort, selection of non-exposed cohort, ascertainment of exposure, and demonstration that outcome of interest was not present at the start of the study.

†Maximum of 2 points were given for controlling for the primary confounding variable (age) and 4 of the 6 secondary variables (Sex, adiposity, smoking, family history, energy intake and physical activity)

‡Maximum of 3 points were given for assessment of outcome, long enough follow up time for an outcome to occur, and adequate mitigation of loss to follow up (<10% loss).

§ A maximum of 9 points were awarded with studies judged high (score  $\geq 7$ ), moderate (score = 6) or low (score  $\leq 5$ ) study quality.

**Supplementary table 4 – Influence analysis**

|                                                      | RR [95% CI]       | p-value | I <sup>2</sup> | p-value |
|------------------------------------------------------|-------------------|---------|----------------|---------|
| Overall                                              | 0.20 [0.17, 0.23] | <0.001  | 87             | <0.001  |
| Removal of                                           |                   |         |                |         |
| Australian Diabetes, Obesity and Lifestyle Study (1) | 0.19 [0.17, 0.22] | <0.001  | 87             | <0.001  |
| Cardiovascular Health Study (2)                      | 0.20 [0.17, 0.23] | <0.001  | 87             | <0.001  |
| China Kadoorie Biobank Study — F (3)                 | 0.20 [0.17, 0.23] | <0.001  | 87             | <0.001  |
| China Kadoorie Biobank Study — M (3)                 | 0.20 [0.17, 0.23] | <0.001  | 87             | <0.001  |
| Dongfeng-Tongji Cohort (4)                           | 0.19 [0.17, 0.21] | <0.001  | 76             | <0.001  |
| EPIC-E3N Cohort (5)                                  | 0.20 [0.17, 0.23] | <0.001  | 87             | <0.001  |
| EPIC-NL (6)                                          | 0.19 [0.17, 0.22] | <0.001  | 87             | <0.001  |
| EPIC-Norfolk (7)                                     | 0.19 [0.17, 0.22] | <0.001  | 87             | <0.001  |
| EPIC-Potsdam(8)                                      | 0.20 [0.18, 0.23] | <0.001  | 85             | <0.001  |
| FINRISK Study — F (9)                                | 0.20 [0.17, 0.23] | <0.001  | 87             | <0.001  |
| FINRISK Study — M (9)                                | 0.20 [0.17, 0.23] | <0.001  | 87             | <0.001  |
| Finnish Diabetes Prevention Study (10)               | 0.20 [0.17, 0.23] | <0.001  | 87             | <0.001  |
| Health Professionals Follow-up Study(12)             | 0.20 [0.17, 0.23] | <0.001  | 87             | <0.001  |
| Hortega Study (11)                                   | 0.20 [0.17, 0.23] | <0.001  | 87             | <0.001  |
| Multiethnic Cohort — Caucasians — F (13)             | 0.19 [0.17, 0.23] | <0.001  | 87             | <0.001  |
| Multiethnic Cohort — Caucasians — M (13)             | 0.19 [0.17, 0.23] | <0.001  | 87             | <0.001  |
| Multiethnic Cohort — Japanese — F (13)               | 0.19 [0.17, 0.22] | <0.001  | 87             | <0.001  |
| Multiethnic Cohort — Japanese — M (13)               | 0.19 [0.17, 0.22] | <0.001  | 87             | <0.001  |
| Multiethnic Cohort — Native Hawaiians — F (13)       | 0.19 [0.17, 0.23] | <0.001  | 87             | <0.001  |
| Multiethnic Cohort — Native Hawaiians — M (13)       | 0.19 [0.17, 0.22] | <0.001  | 87             | <0.001  |
| NIH-AARP Diet and Health Study — F (14)              | 0.20 [0.17, 0.23] | <0.001  | 86             | <0.001  |
| NIH-AARP Diet and Health Study — M (14)              | 0.20 [0.17, 0.23] | <0.001  | 87             | <0.001  |
| Nurses Health Study I (12)                           | 0.20 [0.18, 0.23] | <0.001  | 84             | <0.001  |
| Nurses Health Study II (15)                          | 0.20 [0.17, 0.23] | <0.001  | 86             | <0.001  |
| Physicians Health Study I (16)                       | 0.19 [0.17, 0.22] | <0.001  | 87             | <0.001  |
| Shanghai Men's Health Study (17)                     | 0.19 [0.17, 0.23] | <0.001  | 87             | <0.001  |
| Shanghai Women's Health Study (17)                   | 0.19 [0.16, 0.23] | <0.001  | 87             | <0.001  |
| UK Biobank Study (18)                                | 0.19 [0.17, 0.23] | <0.001  | 87             | <0.001  |
| Västerbotten Intervention Programme(19)              | 0.19 [0.17, 0.22] | <0.001  | 87             | <0.001  |
| Women's Health Study (16)                            | 0.20 [0.17, 0.23] | <0.001  | 87             | <0.001  |

The pooled relative risk was recalculated after removal of each independent study. Heterogeneity was assessed with the Cochrane Q statistic (Chi<sup>2</sup>) and represented with the I<sup>2</sup> value. Any value of I<sup>2</sup>>50% indicates significant heterogeneity. The results were shown using relative risk (RR) with 95% confidence interval

**Supplementary table 5 – Grade Assessment**

| Quality assessment                                                                                      |                       |                                      |                                       |                                      |                                     |                                          |                                                                     | Study event rates (%)   | Effect                                                                                                 | Quality Importance     |
|---------------------------------------------------------------------------------------------------------|-----------------------|--------------------------------------|---------------------------------------|--------------------------------------|-------------------------------------|------------------------------------------|---------------------------------------------------------------------|-------------------------|--------------------------------------------------------------------------------------------------------|------------------------|
| No of studies                                                                                           | Design                | Study quality                        | Inconsistency                         | Indirectness                         | Imprecision                         | Publication bias                         | Other considerations                                                |                         | Relative (95% CI)                                                                                      |                        |
| Effect of combined low risk lifestyle behaviors on incident type 2 diabetes (follow-up median 13 years) |                       |                                      |                                       |                                      |                                     |                                          |                                                                     |                         |                                                                                                        |                        |
| 30 comparisons (19 cohorts)                                                                             | observational studies | no serious risk of bias <sup>1</sup> | no serious inconsistency <sup>2</sup> | no serious indirectness <sup>3</sup> | no serious imprecision <sup>4</sup> | no serious publication bias <sup>5</sup> | Large magnitude of effect <sup>6</sup> , Dose-response <sup>7</sup> | 75,669/1,693,753 (4.5%) | Extreme comparison: RR 0.196 (95% CI, 0.170 to 0.227)<br><br>Global DRM RR 0.15 [95% CI, 0.12 to 0.18] | ⊕⊕⊕⊕ HIGH <sup>8</sup> |

1. The overall study quality remained high in all the studies (supplementary table 3) and only one study was not rated. Overall study quality was adjusted to be high.
2. Although heterogeneity was high ( $I^2$  was 87%) which was more than the cut-off of  $I^2 > 50\%$ ,  $P_Q < 0.10$ , this inconsistency was not considered to be of concern as the magnitude of the effect remained high, and all individual point estimates were in the same direction across with almost all being lower than an  $RR \leq 0.40$ . Further explained in the discussion section of the paper.
3. There was no serious indirectness as the outcome assessment was of T2D rather than intermediate markers.
4. There was no serious imprecision as 95% CI of the pooled estimate did not cross minimally important difference of 5% i.e. 0.05 or 0.95.
5. Although there was some evidence of publication bias by formal testing with the Egger test ( $p=0.06$ ), the trim-and-fill did not impute any missing studies and did not significantly change the pooled estimated. Therefore, the possible publication bias was not considered serious.
6. Upgraded twice for a very large magnitude of effect (pooled  $RR = 0.196$  which is less than  $RR < 0.2$  criteria for very large effect size)
4. Upgraded for a significant dose-response association ( $p < 0.001$ ).
- 5 High ⊕⊕⊕⊕ quality evidence. Starting point for observational studies is low quality; no downgrades and upgraded for evidence of a very large magnitude of effect [+2] and dose-response [+1]) to support the conclusion that adherence to a combination of low-risk lifestyle factors (including healthy body weight, healthy dietary pattern, regular physical activity, smoking abstinence or cessation, and moderate alcohol consumption) lowers type 2 diabetes risk compared with minimum low-risk lifestyle factors.



**Supplementary table 6.** Important studies exploring low-risk lifestyle behaviors and type 2 diabetes that were not included.

| Reference                                                                                                                                                                                                                                                                                                      | Reason for exclusion                                                                                                                                                                                                                            |
|----------------------------------------------------------------------------------------------------------------------------------------------------------------------------------------------------------------------------------------------------------------------------------------------------------------|-------------------------------------------------------------------------------------------------------------------------------------------------------------------------------------------------------------------------------------------------|
| Hu FB, Manson JE, Stampfer MJ, et al (2001) Diet, lifestyle, and the risk of type 2 diabetes mellitus in women. <i>N Engl J Med</i> 345(11):790–797. <a href="https://doi.org/10.1056/NEJMoa010492">https://doi.org/10.1056/NEJMoa010492</a>                                                                   | Duplicate data for Nurses Health Study. So Li 2019 was used.                                                                                                                                                                                    |
| Shan Z, Li Y, Zong G et al (2018) Rotating night shift work and adherence to unhealthy lifestyle in predicting risk of type 2 diabetes: results from two large US cohorts of female nurses. <i>BMJ</i> 363: k4641                                                                                              | Duplicate data for Nurses Health Study I and Nurses Health Study II from Li 2019 and Li 2015, respectively. Data was less granular (gave 3 score divisions) in this publication so Li 2019 and Li 2015 (gave 4 score divisions) were preferred. |
| Laaksonen, M.A.; Knekt, P.; Rissanen, H.; Härkänen, T.; Virtala, E.; Marniemi, J.; Aromaa, A.; Heliövaara, M.; Reunanen, A. The relative importance of modifiable potential risk factors of type 2 diabetes: a meta-analysis of two cohorts. <i>European Journal of Epidemiology</i> 2010, 25, 115–124.        | Did not include diet and included biomarkers in the score.                                                                                                                                                                                      |
| Effoe VS, Carnethon MR, Echouffo-Tcheugui JB et al (2017) The American Heart Association ideal cardiovascular health and incident type 2 diabetes mellitus among blacks: the Jackson Heart Study. <i>J Am Heart Assoc</i> 6(6):e005008                                                                         | Included biomarkers in the score                                                                                                                                                                                                                |
| Fretts AM, Howard BV, McKnight B et al (2014) Life s Simple 7 and incidence of diabetes among American Indians: the Strong Heart Family Study. <i>Diabetes Care</i> 37(8):2240–2245. <a href="https://doi.org/10.2337/dc13-2267">https://doi.org/10.2337/dc13-2267</a>                                         | Included biomarkers in the score                                                                                                                                                                                                                |
| Joseph JJ, Echouffo-Tcheugui JB, Carnethon MR et al (2016) The association of ideal cardiovascular health with incident type 2 diabetes mellitus: the Multi-Ethnic Study of Atherosclerosis. <i>Diabetologia</i> 59(9):1893–1903.                                                                              | Included biomarkers in the score                                                                                                                                                                                                                |
| Joseph JJ, Echouffo-Tcheugui JB, Talegawkar SA et al (2017) Modifiable lifestyle risk factors and incident diabetes in African Americans. <i>Am J Prev Med</i> 53(5):e165–e174. <a href="https://doi.org/10.1016/j.amepre.2017.06.018">https://doi.org/10.1016/j.amepre.2017.06.018</a>                        | Included other factors like tv watching and sleep disordered breathing in the score.                                                                                                                                                            |
| Liu X, Cui L, Wang A et al (2016) Cumulative exposure to ideal cardiovascular health and incident diabetes in a Chinese population: the Kailuan Study. <i>J Am Heart Assoc</i> 5(9):e004132                                                                                                                    | Included biomarkers in the score                                                                                                                                                                                                                |
| Nguyen B, Bauman A, Ding D (2017) Incident type 2 diabetes in a large Australian cohort study: does physical activity or sitting time alter the risk associated with body mass index? <i>J Phys Act Health</i> 14(1):13–19.                                                                                    | Diet was not included                                                                                                                                                                                                                           |
| Zhang Y, Pan X-F, Chen J, et al. Combined lifestyle factors and risk of incident type 2 diabetes and prognosis among individuals with type 2 diabetes: a systematic review and meta-analysis of prospective cohort studies. <i>Diabetologia</i> 2019; published online Sept 4. DOI:10.1007/s00125-019-04985-9. | A systematic review and meta-analysis but included biomarkers as part of lifestyle factors.                                                                                                                                                     |

|                                                                                                                                                                                                                                                                                                                                                                                                                                             |                                                                                                                                                                       |
|---------------------------------------------------------------------------------------------------------------------------------------------------------------------------------------------------------------------------------------------------------------------------------------------------------------------------------------------------------------------------------------------------------------------------------------------|-----------------------------------------------------------------------------------------------------------------------------------------------------------------------|
| Tatsumi Y, Ohno Y, Morimoto A, et al. Lifestyle and the risk of diabetes mellitus in a Japanese population. <i>J Behav Med</i> 2013;36:225–33. doi:10.1007/s10865-012-9427-z                                                                                                                                                                                                                                                                | Used Breslow’s healthy lifestyle factors. Included sleep. However, definition of healthy diet was related to eating breakfast or snacking but not on dietary pattern. |
| Elwood P, Galante J, Pickering J, et al (2013) Healthy Lifestyles Reduce the Incidence of Chronic Diseases and Dementia: Evidence from the Caerphilly Cohort Study. <i>PLoS One</i> 8(12): e81877. doi:10.1371/journal.pone.0081877                                                                                                                                                                                                         | Did not exclude cases of diabetes at baseline                                                                                                                         |
| Wakasugi M, Narita I, Iseki K, Asahi K, Yamagata K, Fujimoto S, Moriyama T, Konta T, Tsuruya K, Kasahara M, Shibagaki Y, Kondo M, Watanabe T; Japan Specific Health Checkups (J-SHC) Study Group. Healthy Lifestyle and Incident Hypertension and Diabetes in Participants with and without Chronic Kidney Disease: The Japan Specific Health Checkups (J-SHC) Study. <i>Intern Med</i> . 2022 Mar 5. doi: 10.2169/internalmedicine.8992-21 | Definition of healthy diet was related to eating breakfast or snacking but not on dietary pattern.                                                                    |
| Han Y, Hu Y, Yu C, Guo Y, Pei P, Yang L, Chen Y, Du H, Sun D, Pang Y, Chen N, Clarke R, Chen J, Chen Z, Li L, Lv J; China Kadoorie Biobank Collaborative Group. Lifestyle, cardiometabolic disease, and multimorbidity in a prospective Chinese study. <i>Eur Heart J</i> . 2021 Sep 7;42(34):3374-3384. doi: 10.1093/eurheartj/ehab413                                                                                                     | Duplicate data for China Kadoorie Biobank. So Lv 2017 was used.                                                                                                       |
| Cao Z, Xu C, Yang H, Li S, Wang Y. The Role of Healthy Lifestyle in Cancer Incidence and Temporal Transitions to Cardiometabolic Disease. <i>JACC CardioOncol</i> . 2021 Dec 21;3(5):663-674. doi: 10.1016/j.jaccao.2021.09.016                                                                                                                                                                                                             | Duplicate data for UK Biobank. So Wang 2022 was used as it had a larger cohort size.                                                                                  |
| Li R, Cai M, Qian ZM, Wang X, Zhang Z, Wang C, Wang Y, Arnold LD, Howard SW, Li H, Lin H. Ambient air pollution, lifestyle, and genetic predisposition associated with type 2 diabetes: findings from a national prospective cohort study. <i>Sci Total Environ</i> . 2022 Aug 5;849:157838. doi: 10.1016/j.scitotenv.2022.157838                                                                                                           | Duplicate data for UK Biobank. So Wang 2022 was used as had a larger cohort size                                                                                      |
| Liu Z, Suo C, Zhao R, Yuan H, Jin L, Zhang T, Chen X. Genetic predisposition, lifestyle risk, and obesity associate with the progression of nonalcoholic fatty liver disease. <i>Dig Liver Dis</i> . 2021 Nov;53(11):1435-1442. doi: 10.1016/j.dld.2021.07.009                                                                                                                                                                              | Duplicate data for UK Biobank. So Wang 2022 was used as had a larger cohort size                                                                                      |
| Song Z, Yang R, Wang W, Huang N, Zhuang Z, Han Y, Qi L, Xu M, Tang YD, Huang T. Association of healthy lifestyle including a healthy sleep pattern with incident type 2 diabetes mellitus among individuals with hypertension. <i>Cardiovasc Diabetol</i> . 2021 Dec 18;20(1):239. doi: 10.1186/s12933-021-01434-z                                                                                                                          | Included sleep and had duplicate data for UK Biobank.                                                                                                                 |
| Zhao Y, Li Y, Zhuang Z, Song Z, Wang W, Huang N, Dong X, Xiao W, Jia J, Liu Z, Li D, Huang T. Associations of polysocial risk score, lifestyle and genetic factors with incident type 2 diabetes: a prospective cohort study. <i>Diabetologia</i> . 2022 Jul 21. doi: 10.1007/s00125-022-05761-y                                                                                                                                            | Included sleep and had duplicate data for UK Biobank.                                                                                                                 |

**Supplementary table 7. Raw Dose Response Data**

| <b>Cohort</b>                                        | <b>Paper Dose</b> | <b>Dose</b> | <b>RR</b> | <b>LCI</b> | <b>UCI</b> | <b>Case</b> | <b>Person Years</b> |
|------------------------------------------------------|-------------------|-------------|-----------|------------|------------|-------------|---------------------|
| Australian Diabetes, Obesity and Lifestyle Study (1) | 2                 | 2           | 1         | 1          | 1          | 122         | 12617               |
|                                                      | 2.5               | 2.5         | 0.75      | 0.69       | 0.799      | 91          | 12617               |
|                                                      | 3                 | 3           | 0.57      | 0.46       | 0.695      | 69          | 12617               |
|                                                      | 3.5               | 3.5         | 0.43      | 0.28       | 0.663      | 53          | 12617               |
|                                                      | 4                 | 4           | 0.33      | 0.17       | 0.639      | 41          | 12617               |
| Cardiovascular Health Study (2)                      | 0                 | 0           | 1.00      | 1.00       | 1.00       | 38          | 1727                |
|                                                      | 1                 | 1           | 0.78      | 0.55       | 1.14       | 105         | 6217                |
|                                                      | 2                 | 2           | 0.58      | 0.41       | 0.82       | 113         | 8980                |
|                                                      | 3                 | 3           | 0.26      | 0.18       | 0.40       | 47          | 8289                |
|                                                      | 4                 | 4           | 0.19      | 0.11       | 0.32       | 24          | 5871.63             |
|                                                      | 5                 | 5           | 0.16      | 0.11       | 0.33       | 10          | 2763.12             |
| China Kadoorie Biobank Study – Men (3)               | 0                 | 0           | 1.00      | 1.00       | 1.00       | 888         | 188,682             |
|                                                      | 1                 | 0.83        | 0.62      | 0.57       | 0.68       | 1212        | 409,074             |
|                                                      | 2                 | 1.67        | 0.34      | 0.31       | 0.37       | 778         | 448,227             |
|                                                      | 3                 | 2.5         | 0.23      | 0.20       | 0.26       | 312         | 244365              |
|                                                      | 4                 | 3.33        | 0.25      | 0.19       | 0.32       | 66          | 47253               |
|                                                      | ≥5                | 4.58        | 0.19      | 0.06       | 0.59       | 3           | 2700                |
| China Kadoorie Biobank Study – Women (3)             | 0                 | 0           | 1.00      | 1.00       | 1.00       | 121         | 32537               |
|                                                      | 1                 | 0.83        | 0.73      | 0.60       | 0.88       | 2435        | 518465              |
|                                                      | 2                 | 1.67        | 0.40      | 0.33       | 0.48       | 1861        | 669926              |
|                                                      | 3                 | 2.50        | 0.24      | 0.20       | 0.29       | 884         | 551475              |
|                                                      | 4                 | 3.33        | 0.16      | 0.13       | 0.21       | 219         | 180589              |
|                                                      | ≥5                | 4.58        | 0.19      | 0.08       | 0.46       | 5           | 5825                |
| Dongfeng-Tongji cohort (4)                           | 0 to 2            | 0.83        | 1         | 1          | 1          | 673         | 24796               |
|                                                      | 3 or 4            | 2.92        | 0.77      | 0.69       | 0.87       | 518         | 44904               |

|                                        |          |      |      |      |       |       |        |
|----------------------------------------|----------|------|------|------|-------|-------|--------|
|                                        | 5 or 6   | 4.58 | 0.54 | 0.45 | 0.65  | 364   | 14146  |
| EPIC-E3N (5)                           | 0 to 2   | 1    | 1    | 1.00 | 1.00  | 4596  | 116334 |
|                                        | 2.5 to 3 | 2.75 | 0.54 | 0.46 | 0.63  | 20523 | 369414 |
|                                        | 3.5 to 4 | 3.75 | 0.31 | 0.27 | 0.37  | 34774 | 625932 |
|                                        | 4.5 to 5 | 4.75 | 0.18 | 0.15 | 0.22  | 12762 | 229716 |
| EPIC-NL (6)                            | 0 or 1   | 0.5  | 1    | 1    | 1     | 71    | 120220 |
|                                        | 2        | 2    | 0.37 | 0.22 | 0.617 | 61    | 120220 |
|                                        | 3 or 4   | 3.5  | 0.26 | 0.16 | 0.422 | 21    | 120220 |
| EPIC-Norfolk(7)                        | 0        | 0    | 1.00 | 1.00 | 1.00  | 74    | 2516   |
|                                        | 1        | 1    | 0.69 | 0.60 | 0.81  | 199   | 9540   |
|                                        | 2        | 2    | 0.3  | 0.23 | 0.37  | 66    | 7473   |
|                                        | 3 to 5   | 4    | 0.24 | 0.16 | 0.36  | 55    | 4626   |
| EPIC-Potsdam (8)                       | 0        | 0    | 1.00 | 1.00 | 1.00  | 148   | 6510   |
|                                        | 1        | 1    | 0.34 | 0.28 | 0.40  | 298   | 42128  |
|                                        | 2        | 2    | 0.22 | 0.17 | 0.27  | 289   | 64551  |
|                                        | 3        | 3    | 0.11 | 0.10 | 0.15  | 113   | 50990  |
|                                        | 4        | 4    | 0.07 | 0.05 | 0.12  | 23    | 16636  |
| Finnish Diabetes Prevention Study (10) | 0        | 0    | 1.00 | 1.00 | 1.00  | 142   | 783    |
|                                        | 1        | 0.6  | 0.86 | 0.60 | 1.23  | 122   | 783    |
|                                        | 2        | 1.2  | 0.67 | 0.45 | 1.00  | 95    | 783    |
|                                        | 3        | 1.8  | 0.61 | 0.38 | 0.98  | 87    | 783    |
|                                        | 4        | 2.4  | 0.34 | 0.18 | 0.66  | 48    | 783    |
|                                        | 5        | 3    | 0.20 | 0.07 | 0.56  | 28    | 783    |
| FINRISK Study – Men (9)                | 0        | 0    | 1.39 | 0.85 | 2.11  | 6000  | 42582  |
|                                        | 1        | 1    | 1    | 1    | 1     | 4317  | 42582  |
|                                        | 2        | 2    | 0.75 | 0.62 | 0.89  | 3238  | 42582  |
|                                        | 3        | 3    | 0.55 | 0.44 | 0.66  | 2374  | 42582  |
|                                        | 4        | 4    | 0.53 | 0.4  | 0.69  | 2288  | 42582  |

|                                                  |                  |     |      |      |      |      |          |
|--------------------------------------------------|------------------|-----|------|------|------|------|----------|
|                                                  | 5                | 5   | 0.1  | 0.05 | 0.2  | 432  | 42582    |
| FINRISK Study – Women (9)                        | 0                | 0   | 1.07 | 0.25 | 4.51 | 5541 | 45763    |
|                                                  | 1                | 1   | 1    | 1    | 1    | 5179 | 45763    |
|                                                  | 2                | 2   | 0.72 | 0.48 | 1.09 | 3729 | 45763    |
|                                                  | 3                | 3   | 0.55 | 0.37 | 0.81 | 2848 | 45763    |
|                                                  | 4                | 4   | 0.4  | 0.27 | 0.6  | 2072 | 45763    |
|                                                  | 5                | 5   | 0.13 | 0.08 | 0.21 | 673  | 45763    |
|                                                  |                  |     |      |      |      |      |          |
| Health Professionals Follow-up Study (15)        | ≤2               | 1   | 1    | 1    | 1    | 1383 | 306138.1 |
|                                                  | 3                | 3   | 0.65 | 0.51 | 0.82 | 78   | 32783.6  |
|                                                  | 4                | 4   | 0.44 | 0.29 | 0.64 | 26   | 15410.5  |
|                                                  | 5                | 5   | 0.19 | 0.1  | 0.38 | 8    | 9122.7   |
| Hortega Study (11)                               | 0 or 1           | 0.5 | 1.00 | 1.00 | 1.00 | 32   | 5227     |
|                                                  | 2                | 2   | 0.83 | 0.44 | 1.56 | 17   | 3458     |
|                                                  | 3 to 5           | 4   | 0.20 | 0.04 | 0.88 | 2    | 2354     |
| Multiethnic cohort - Men; Caucasian (13)         | 1                | 1   | 1    | 1    | 1    | 364  | 36184    |
|                                                  | Combination of 2 | 2   | 0.78 | 0.38 | 1.59 | 283  | 36184    |
|                                                  | Combination of 3 | 3   | 0.55 | 0.33 | 0.90 | 199  | 36184    |
|                                                  | Combination of 4 | 4   | 0.40 | 0.21 | 0.79 | 147  | 36184    |
|                                                  | Combination of 5 | 5   | 0.23 | 0.19 | 0.28 | 85   | 36184    |
| Multiethnic cohort - Men; Japanese American (13) | 1                | 1   | 1    | 1    | 1    | 781  | 40049    |
|                                                  | Combination of 2 | 2   | 0.97 | 0.49 | 1.93 | 759  | 40049    |
|                                                  | Combination of 3 | 3   | 0.70 | 0.40 | 1.21 | 545  | 40049    |
|                                                  | Combination of 4 | 4   | 0.48 | 0.25 | 0.92 | 376  | 40049    |
|                                                  | Combination of 5 | 5   | 0.26 | 0.20 | 0.33 | 203  | 40049    |
| Multiethnic cohort - Men; Native Hawaiian (13)   | 1                | 1   | 1    | 1    | 1    | 228  | 11069    |
|                                                  | Combination of 2 | 2   | 0.95 | 0.26 | 3.51 | 217  | 11069    |
|                                                  | Combination of 3 | 3   | 0.74 | 0.09 | 6.49 | 169  | 11069    |
|                                                  | Combination of 4 | 4   | 0.54 | 0.06 | 5.00 | 122  | 11069    |

|                                                       |                  |   |      |      |      |       |         |
|-------------------------------------------------------|------------------|---|------|------|------|-------|---------|
|                                                       | Combination of 5 | 5 | 0.24 | 0.15 | 0.39 | 55    | 11069   |
| Multiethnic cohort - Women;<br>Caucasian (13)         | 1                | 1 | 1.00 | 1.00 | 1.00 | 238   | 34742   |
|                                                       | Combination of 2 | 2 | 0.78 | 0.38 | 1.59 | 185   | 34742   |
|                                                       | Combination of 3 | 3 | 0.55 | 0.33 | 0.90 | 130   | 34742   |
|                                                       | Combination of 4 | 4 | 0.40 | 0.21 | 0.79 | 96    | 34742   |
|                                                       | Combination of 5 | 5 | 0.23 | 0.19 | 0.28 | 55    | 34742   |
| Multiethnic cohort - Women;<br>Japanese American (13) | 1                | 1 | 1.00 | 1.00 | 1.00 | 693   | 45007   |
|                                                       | Combination of 2 | 2 | 0.97 | 0.49 | 1.93 | 673   | 45007   |
|                                                       | Combination of 3 | 3 | 0.70 | 0.40 | 1.21 | 483   | 45007   |
|                                                       | Combination of 4 | 4 | 0.48 | 0.25 | 0.92 | 333   | 45007   |
|                                                       | Combination of 5 | 5 | 0.26 | 0.20 | 0.33 | 180   | 45007   |
| Multiethnic cohort - Women;<br>Native Hawaiian (13)   | 1                | 1 | 1.00 | 1.00 | 1.00 | 272   | 14377   |
|                                                       | Combination of 2 | 2 | 0.95 | 0.26 | 3.51 | 259   | 14377   |
|                                                       | Combination of 3 | 3 | 0.74 | 0.09 | 6.49 | 202   | 14377   |
|                                                       | Combination of 4 | 4 | 0.54 | 0.06 | 5.00 | 146   | 14377   |
|                                                       | Combination of 5 | 5 | 0.24 | 0.15 | 0.39 | 66    | 14377   |
| NIH-AARP Diet and Health<br>Study – Men (14)          | 0                | 0 | 1.00 | 1.00 | 1.00 | 860   | 47220   |
|                                                       | 1                | 1 | 0.75 | 0.68 | 0.81 | 3129  | 218910  |
|                                                       | 2                | 2 | 0.54 | 0.50 | 0.59 | 3669  | 345020  |
|                                                       | 3                | 3 | 0.40 | 0.36 | 0.44 | 2433  | 315370  |
|                                                       | 4                | 4 | 0.24 | 0.21 | 0.27 | 815   | 177,160 |
|                                                       | 5                | 5 | 0.15 | 0.1  | 0.18 | 125   | 46,280  |
| NIH-AARP Diet and Health<br>Study – Women (14)        | 0                | 0 | 1    | 1    | 1    | 803   | 49,490  |
|                                                       | 1                | 1 | 0.73 | 0.67 | 0.8  | 2,578 | 216,880 |
|                                                       | 2                | 2 | 0.48 | 0.44 | 0.52 | 2,204 | 277,490 |
|                                                       | 3                | 3 | 0.29 | 0.27 | 0.33 | 1,087 | 232,290 |
|                                                       | 4                | 4 | 0.13 | 0.11 | 0.15 | 272   | 127,000 |
|                                                       | 5                | 5 | 0.08 | 0.04 | 0.11 | 25    | 21,680  |

|                                                  |        |      |      |      |      |      |            |
|--------------------------------------------------|--------|------|------|------|------|------|------------|
| Nurses Health Study I (15)                       | ≤2     | 1    | 1    | 1.00 | 1.00 | 4367 | 1152615.89 |
|                                                  | 3      | 3    | 0.58 | 0.50 | 0.66 | 212  | 31475.2    |
|                                                  | 4      | 4    | 0.48 | 0.35 | 0.66 | 39   | 7923.3     |
|                                                  | 5      | 5    | 0.06 | 0.03 | 0.15 | 5    | 5742.6     |
| Nurses Health Study II (15)                      | ≤2     | 1    | 1    | 1    | 1    | 3911 | 1327357.51 |
|                                                  | 3      | 3    | 0.51 | 0.44 | 0.58 | 228  | 42524.2    |
|                                                  | 4      | 4    | 0.38 | 0.27 | 0.52 | 36   | 10285.8    |
|                                                  | 5      | 5    | 0.06 | 0.03 | 0.14 | 6    | 7414       |
| Physicians Health Study I (12)                   | 0      | 0    | 1    | 1    | 1    | 313  | 33109      |
|                                                  | 1      | 1    | 0.70 | 0.62 | 0.79 | 699  | 107237     |
|                                                  | 2      | 2    | 0.50 | 0.43 | 0.56 | 665  | 157929     |
|                                                  | 3      | 3    | 0.34 | 0.28 | 0.39 | 321  | 122763     |
|                                                  | 4+     | 4.5  | 0.24 | 0.18 | 0.30 | 98   | 51641      |
| Shanghai Men's Health Study (17)                 | 0      | 0    | 1    | 1    | 1    | 641  | 57400.3    |
|                                                  | 1      | 1    | 0.49 | 0.42 | 0.57 | 1422 | 187575.2   |
|                                                  | 2      | 2    | 0.34 | 0.29 | 0.40 | 1061 | 201473.8   |
|                                                  | 3      | 3    | 0.23 | 0.20 | 0.27 | 191  | 72707.6    |
| Shanghai Women's Health Study (17)               | 0      | 0    | 1    | 1    | 1    | 1234 | 107947.5   |
|                                                  | 1      | 1    | 0.54 | 0.48 | 0.61 | 2590 | 354334.5   |
|                                                  | 2      | 2    | 0.36 | 0.32 | 0.40 | 1771 | 382159.0   |
|                                                  | 3      | 3    | 0.24 | 0.21 | 0.27 | 330  | 137063     |
| Swedish Västerbotten Intervention Programme (19) | 0 or 1 | 0.42 | 1    | 1    | 1    | 139  | 11,000     |
|                                                  | 2      | 1.66 | 0.68 | 0.47 | 1.02 | 420  | 44,500     |
|                                                  | 3      | 2.5  | 0.5  | 0.35 | 0.74 | 612  | 81,800     |
|                                                  | 4      | 3.33 | 0.4  | 0.27 | 0.58 | 460  | 84,900     |
|                                                  | 5      | 4.17 | 0.34 | 0.23 | 0.49 | 211  | 51,000     |
|                                                  | 6      | 5    | 0.27 | 0.18 | 0.40 | 37   | 12,500     |
| UK Biobank Study (18)                            | 0 or 1 | 0.5  | 1    | 1    | 1    | 1193 | 283271     |

|                           |        |     |      |      |      |      |           |
|---------------------------|--------|-----|------|------|------|------|-----------|
|                           | 2 or 3 | 2.5 | 0.53 | 0.49 | 0.58 | 3520 | 1660336.4 |
|                           | 4 or 5 | 4.5 | 0.21 | 0.19 | 0.24 | 655  | 873535.9  |
| Women's Health Study (16) | 0      | 0   | 1.00 | 1.00 | 1.00 | 415  | 34307     |
|                           | 1      | 1   | 0.77 | 0.66 | 0.87 | 890  | 113698    |
|                           | 2      | 2   | 0.45 | 0.39 | 0.52 | 676  | 148278    |
|                           | 3      | 3   | 0.37 | 0.30 | 0.44 | 320  | 114491    |
|                           | 4+     | 4.5 | 0.20 | 0.13 | 0.28 | 89   | 51641     |

**Abbreviations: RR=relative risk, LCI=lower confidence interval, UCI=upper confidence interval**



**Supplementary figure 1.** Dose-response plot of the association of the number of low-risk lifestyle behaviors with incident type 2 diabetes. The grey line represents the relative risks (RRs) for linear dose-response and the black boxes with vertical bars represent the estimated aggregate relative risks (RRs) and 95% CIs for the best-fit non-linear dose-response for each low-risk lifestyle behavior. The light gray circles represent the actual RR point estimates for the different behavior scores from each cohort comparison; the size of the circle is related to the inverse of its variance. The smaller gray triangles with dark gray outline represent the baseline score category for each separate study; a small amount of jitter or random-noise has been added in the graphic display for these gray squares and circles to display overlapping estimates separately. Each additional low risk lifestyle behavior would result in 33% lower risk of type 2 diabetes (RR, 0.67 [95% CI, 0.64 to 0.70];  $P_{\text{linear}} < 0.001$ ). In the non-linear model, compared to adherence to no low-risk lifestyle behaviors, the estimated RRs were 0.70 [95% CI, 0.64 to 0.78] for adherence to one-behavior, 0.49 [95% CI, 0.42 to 0.57] for two-combined behaviors, 0.33 [95% CI, 0.28 to 0.40] for three-combined behaviors, 0.22 [95% CI, 0.19 to 0.27] for four-combined behaviors, and 0.15 [95% CI, 0.12 to 0.18] for all five-combined behaviors [Global DRM] ( $P_{\text{non-linear}} < 0.001$ ).

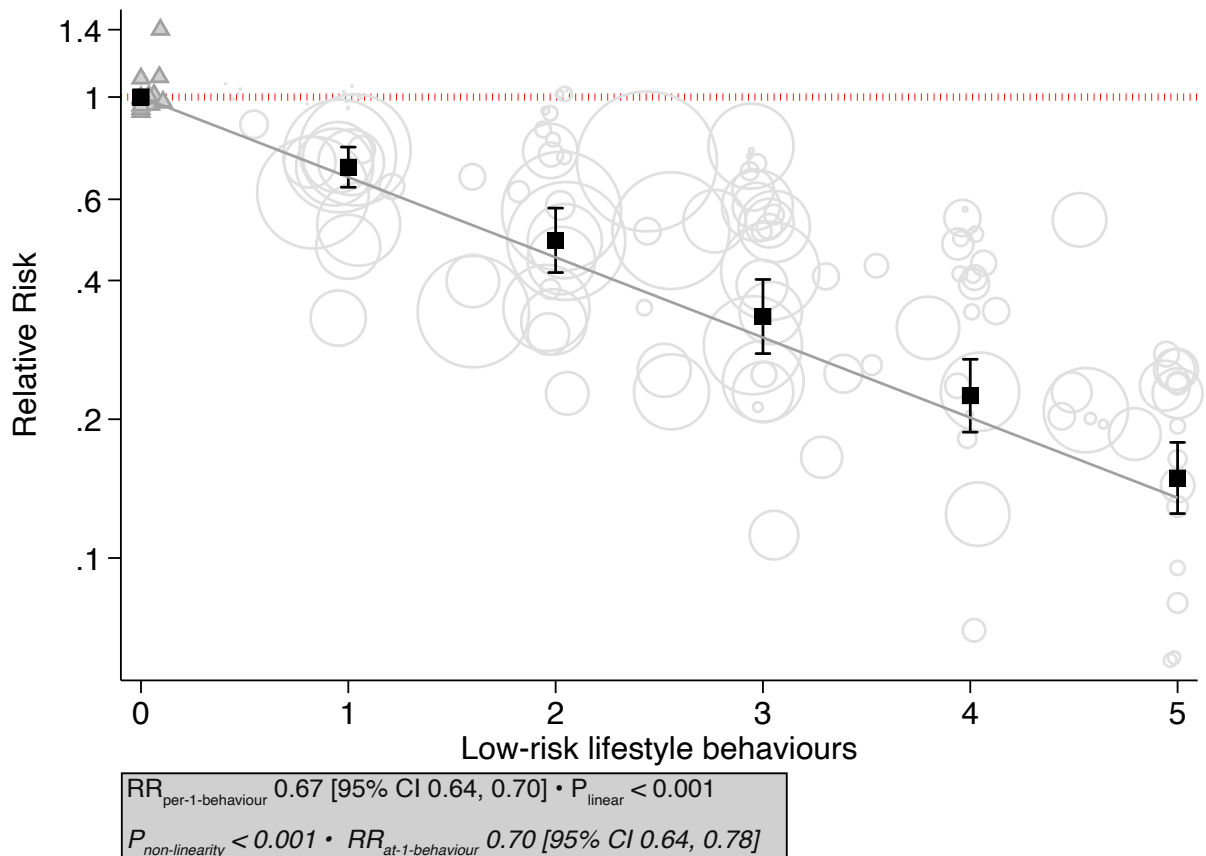

**Supplementary figure 2.** Funnel plot for publication bias. Begg's funnel plot and Egger's test with the natural log of relative risk (RR) for incident diabetes when comparing extreme comparisons of multiple low-risk lifestyle behaviors. The vertical line represents the pooled estimate. Diagonal lines represent pseudo 95% confidence intervals. Circles represent log RR estimates for individual cohort comparisons.

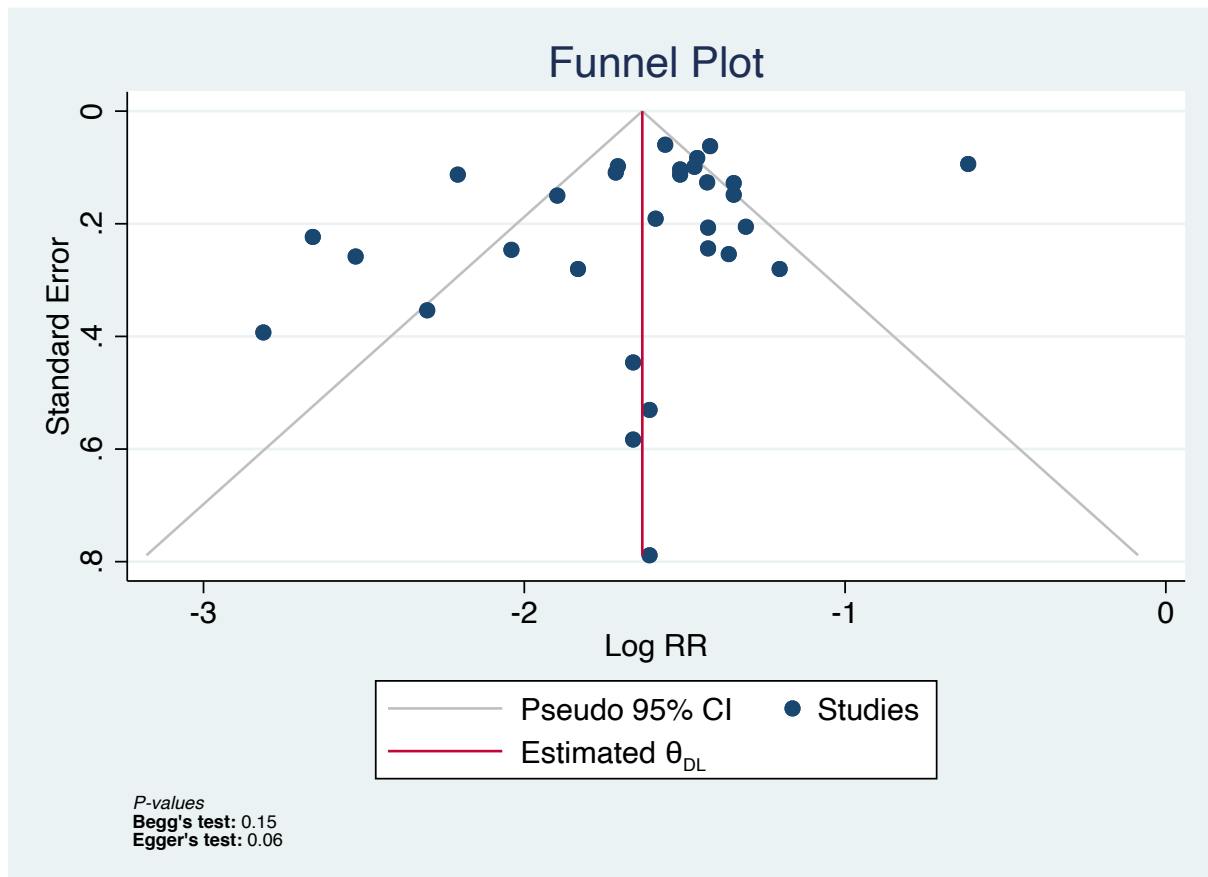

**Supplementary figure 3.** Trim-and-fill plot of the log of relative risk (RR) for incident diabetes when comparing extreme comparisons of multiple low-risk lifestyle behaviors. The vertical line represents the pooled estimate. Diagonal lines represent pseudo 95% confidence intervals. Blue dots represent observed estimates of individual cohort comparisons, and orange dots represent imputed studies using Duval and Tweedie trim-and-fill using right-most run estimator(20).

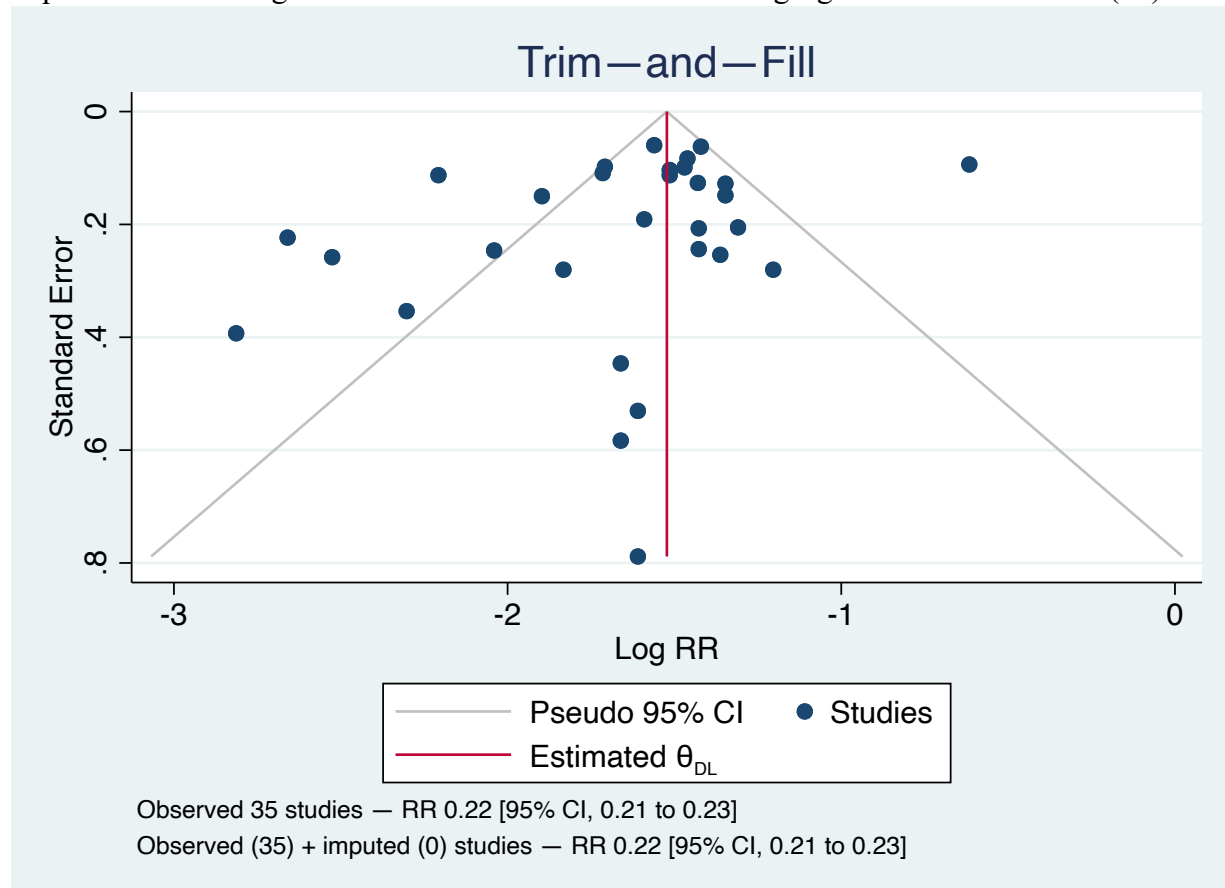

**Supplementary figure 4** – Forest plot of the association of multiple low-risk lifestyle behaviors with type 2 diabetes incidence (highest  $\geq 3$  vs. lowest number of behaviors  $\leq 3$ ). The individual study relative risk (RR) estimates are indicated by blue squares, the size proportional to its weight. The blue horizontal lines represent confidence intervals (CIs). Overall pooled estimate is represented by the first green diamond and the prediction interval is represented by the second green diamond. Estimates  $< 1.0$  indicate protective association and  $RR > 1.0$  indicate an adverse association. Comparison is between highest versus lowest number of low-risk lifestyle behaviors. M=Men; W=Women; N=number of participants; RR=relative risk.

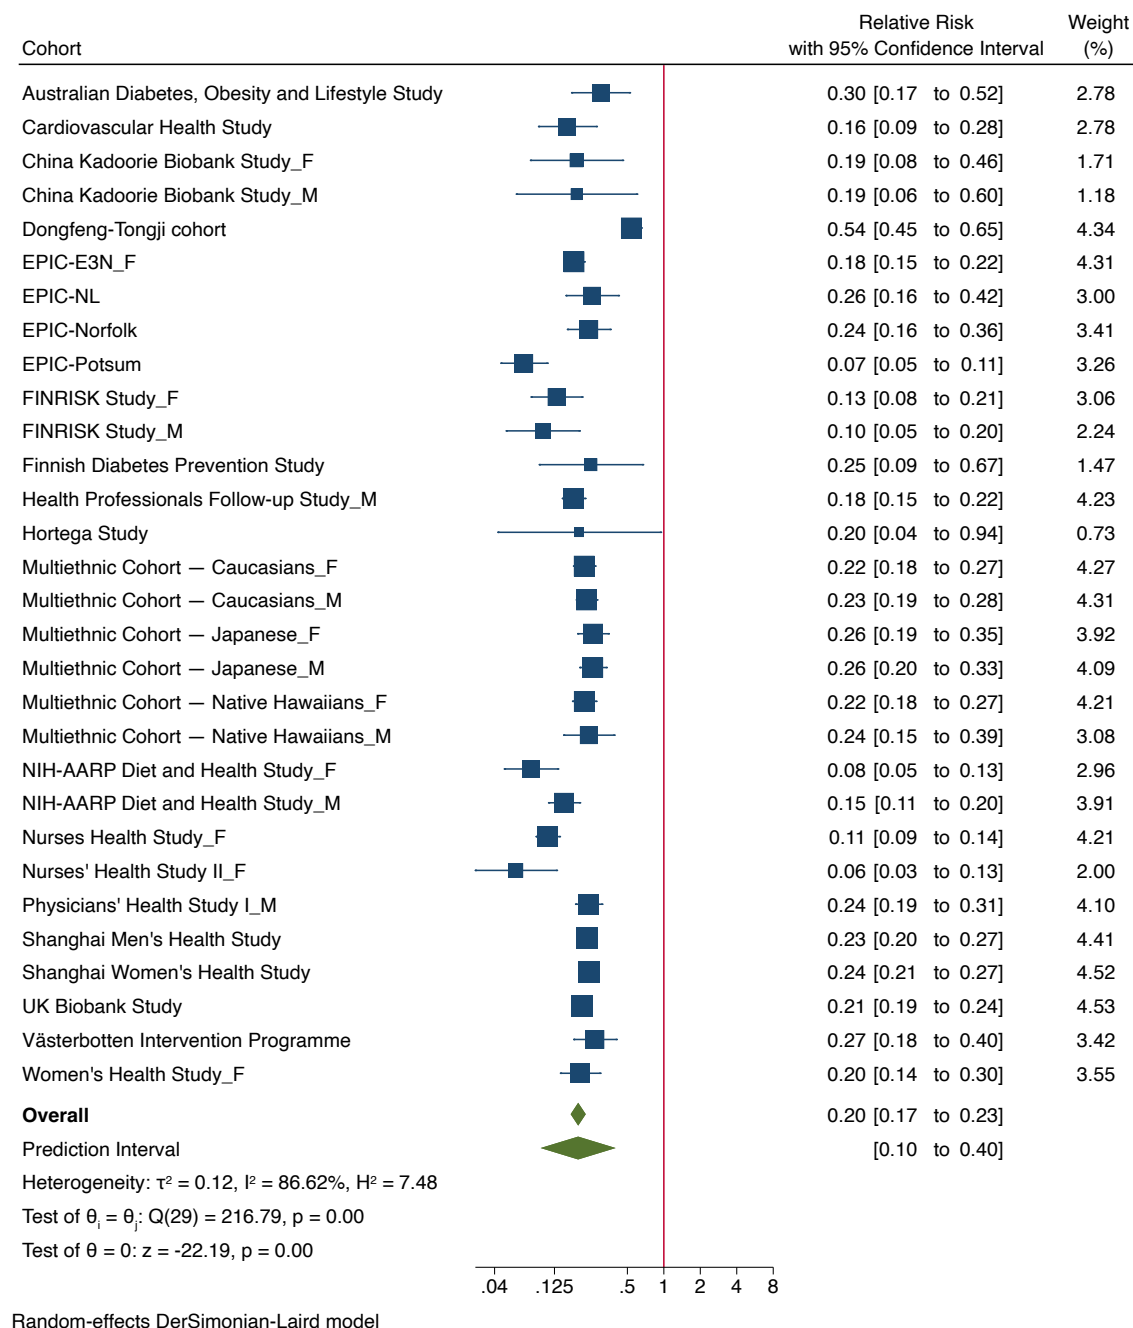

## Bibliography for the supplementary section

1. Dow C, Balkau B, Bonnet F, Mancini F, Rajaobelina K, Shaw J, Magliano DJ, Fagherazzi G. Strong adherence to dietary and lifestyle recommendations is associated with decreased type 2 diabetes risk in the AusDiab cohort study. *Prev Med* 2019;123:208-216
2. Mozaffarian D, Kamineni A, Carnethon M, Djousse L, Mukamal KJ, Siscovick D. Lifestyle risk factors and new-onset diabetes mellitus in older adults: the cardiovascular health study. *Arch Intern Med* 2009;169:798-807
3. Lv J, Yu C, Guo Y, Bian Z, Yang L, Chen Y, Hu X, Hou W, Chen J, Chen Z, Qi L, Li L. Adherence to a healthy lifestyle and the risk of type 2 diabetes in Chinese adults. *Int J Epidemiol* 2017;46:1410-1420
4. Han X, Wei Y, Hu H, Wang J, Li Z, Wang F, Long T, Yuan J, Yao P, Wei S, Wang Y, Zhang X, Guo H, Yang H, Wu T, He M. Genetic Risk, a Healthy Lifestyle, and Type 2 Diabetes: the Dongfeng-Tongji Cohort Study. *J Clin Endocrinol Metab* 2020;105
5. Rajaobelina K, Dow C, Romana Mancini F, Dartois L, Boutron-Ruault MC, Balkau B, Bonnet F, Fagherazzi G. Population attributable fractions of the main type 2 diabetes mellitus risk factors in women: Findings from the French E3N cohort. *J Diabetes* 2019;11:242-253
6. Joosten MM, Grobbee DE, van der AD, Verschuren WM, Hendriks HF, Beulens JW. Combined effect of alcohol consumption and lifestyle behaviors on risk of type 2 diabetes. *The American journal of clinical nutrition* 2010;91:1777-1783
7. Simmons RK, Harding A-H, Jakes RW, Welch A, Wareham NJ, Griffin SJ. How much might achievement of diabetes prevention behaviour goals reduce the incidence of diabetes if implemented at the population level? *Diabetologia* 2006;49:905-911
8. Ford ES, Bergmann MM, Kroger J, Schienkiewitz A, Weikert C, Boeing H. Healthy living is the best revenge: findings from the European Prospective Investigation Into Cancer and Nutrition-Potsdam study. *Archives of internal medicine* 2009;169:1355-1362
9. Tuomilehto J, Wang Y, Hu G, Jousilahti P. Avoidance of type 2 diabetes (T2D) depends on adherence with multiple concomitant healthy lifestyle traits: a prospective real-life population-based observation in finland. *Journal Of Diabetes* 2013;5
10. Lindstrom J, Peltonen M, Eriksson JG, Ilanne-Parikka P, Aunola S, Keinanen-Kiukaanniemi S, Uusitupa M, Tuomilehto J. Improved lifestyle and decreased diabetes risk over 13 years: long-term follow-up of the randomised Finnish Diabetes Prevention Study (DPS). *Diabetologia* 2013;56:284-293
11. Delgado-Velandia M, Gonzalez-Marrachelli V, Domingo-Rellosa A, Galvez-Fernandez M, Grau-Perez M, Olmedo P, Galan I, Rodriguez-Artalejo F, Amigo N, Briongos-Figuero L, Redon J, Martin-Escudero JC, Monleon-Salvado D, Tellez-Plaza M, Sotos-Prieto M. Healthy lifestyle, metabolomics and incident type 2 diabetes in a population-based cohort from Spain. *Int J Behav Nutr Phys Act* 2022;19:8
12. Li Y, Schoufour J, Wang DD, Dhana K, Pan A, Liu X, Song M, Liu G, Shin HJ, Sun Q, Al-Shaar L, Wang M, Rimm EB, Hertzmark E, Stampfer MJ, Willett WC, Franco OH, Hu FB. Healthy lifestyle and life expectancy free of cancer, cardiovascular disease, and type 2 diabetes: prospective cohort study. *Bmj* 2020;368:l6669
13. Steinbrecher A, Morimoto Y, Heak S, Ollberding NJ, Geller KS, Grandinetti A, Kolonel LN, Maskarinec G. The preventable proportion of type 2 diabetes by ethnicity: the multiethnic cohort. *Ann Epidemiol* 2011;21:526-535
14. Reis JP, Loria CM, Sorlie PD, Park Y, Hollenbeck A, Schatzkin A. Lifestyle factors and risk for new-onset diabetes: a population-based cohort study. *Annals of internal medicine* 2011;155:292-299
15. Li Y, Ley SH, Tobias DK, Chiuev SE, VanderWeele TJ, Rich-Edwards JW, Curhan GC, Willett WC, Manson JE, Hu FB, Qi L. Birth weight and later life adherence to unhealthy lifestyles in predicting type 2 diabetes: prospective cohort study. *Bmj* 2015;351:h3672
16. Djousse L, Driver JA, Gaziano JM, Buring JE, Lee IM. Association between modifiable lifestyle factors and residual lifetime risk of diabetes. *Nutr Metab Cardiovasc Dis* 2013;23:17-22
17. Shen QM, Li HL, Li ZY, Jiang YF, Ji XW, Tan YT, Xiang YB. Joint impact of BMI, physical activity and diet on type 2 diabetes: Findings from two population-based cohorts in China. *Diabet Med* 2022;39:e14762
18. Wang W, Lv J, Yu C, Guo Y, Pei P, Zhuang Z, Yang L, Millwood IY, Walters RG, Chen Y, Du H, Wu X, Chen J, Chen Z, Clarke R, Huang T, Li L. Lifestyle factors and fetal and childhood origins of type 2 diabetes: a prospective study of Chinese and European adults. *The American journal of clinical nutrition* 2022;115:749-758

19. Long GH, Johansson I, Rolandsson O, Wennberg P, Fharm E, Weinehall L, Griffin SJ, Simmons RK, Norberg M. Healthy behaviours and 10-year incidence of diabetes: a population cohort study. *Prev Med* 2015;71:121-127
20. Duval S, Tweedie R. Trim and fill: A simple funnel-plot-based method of testing and adjusting for publication bias in meta-analysis. *Biometrics* 2000;56:455-463
